# Supplementary material for: Synergistic Effects of Nano-Sized Titanium Dioxide and Zinc on the Photosynthetic Capacity and Survival of Anabaena sp
Source: Int J Mol Sci. 2013 Jul 11;14(7):14395–407. doi: 10.3390/ijms140714395 (PMC3742250; doi:10.3390/ijms140714395)

## Supplementary Information

**Table S1.** The remaining  $\text{Zn}^{2+}$  concentration in the supernatants of the algae solution.

| Initial $\text{Zn}^{2+}$<br>concentration (mg/L) | The remaining $\text{Zn}^{2+}$ concentration (mg/L) |                                                |                                                 |
|--------------------------------------------------|-----------------------------------------------------|------------------------------------------------|-------------------------------------------------|
|                                                  | <i>Anabaena</i> sp.                                 | <i>Anabaena</i> sp./ $\text{TiO}_2$ (1.0 mg/L) | <i>Anabaena</i> sp./ $\text{TiO}_2$ (10.0 mg/L) |
| 0.1                                              | 0.048                                               | 0.045                                          | 0.044                                           |
| 0.3                                              | 0.126                                               | 0.093                                          | 0.085                                           |
| 0.5                                              | 0.249                                               | 0.198                                          | 0.188                                           |
| 0.7                                              | 0.410                                               | 0.341                                          | 0.222                                           |
| 1.0                                              | 0.538                                               | 0.440                                          | 0.331                                           |

**Table S2.** Compounds and their concentrations in the BG-11 culture medium.

| Component                                 | Amount (mL) | Stock solution (g/L)                                      |
|-------------------------------------------|-------------|-----------------------------------------------------------|
| $\text{NaNO}_3$                           | 100         | 15.0                                                      |
| $\text{K}_2\text{HPO}_4$                  | 10          | 4.0                                                       |
| $\text{MgSO}_4 \cdot 7\text{H}_2\text{O}$ | 10          | 7.5                                                       |
| $\text{CaCl}_2 \cdot 2\text{H}_2\text{O}$ | 10          | 3.6                                                       |
| Citric acid                               | 10          | 0.6                                                       |
| Ferric ammonium citrate                   | 10          | 0.6                                                       |
| $\text{EDTANa}_2$                         | 10          | 0.1                                                       |
| $\text{Na}_2\text{CO}_3$                  | 10          | 2.0                                                       |
|                                           |             | $\text{H}_3\text{BO}_3$ 2.86                              |
|                                           |             | $\text{MnCl}_2 \cdot 4\text{H}_2\text{O}$ 1.86            |
|                                           |             | $\text{ZnSO}_4 \cdot 7\text{H}_2\text{O}$ 0.22            |
| Trace metal solution                      | 1           | $\text{Na}_2\text{MoO}_4 \cdot 2\text{H}_2\text{O}$ 0.39  |
|                                           |             | $\text{CuSO}_4 \cdot 5\text{H}_2\text{O}$ 0.08            |
|                                           |             | $\text{Co}(\text{NO}_3)_2 \cdot 6\text{H}_2\text{O}$ 0.05 |

**Figure S1.** The settling characteristics of the different concentrations nano- $\text{TiO}_2$  with time.

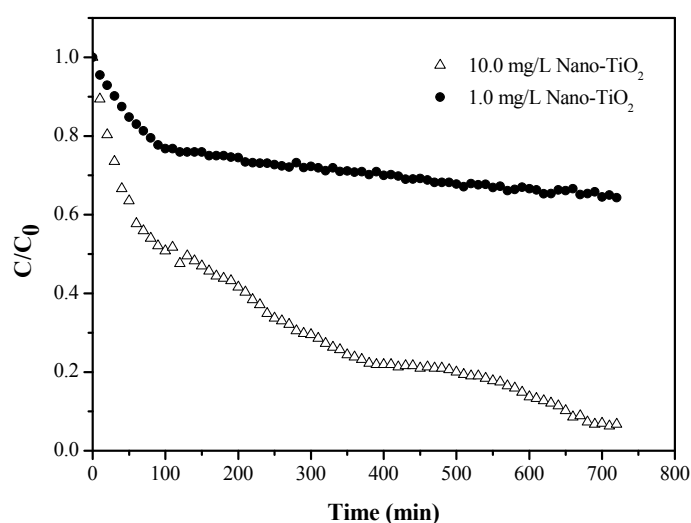

Supplement: Supplementary file 1 [file ijms-14-14395-s001.pdf]
